# Supplementary material for: Genetic risk, adherence to healthy lifestyle and acute cardiovascular and thromboembolic complications following SARS-COV-2 infection
Source: PubMed Central journal article supplement (PMC10400557; doi:10.1038/s41467-023-40310-0), 2023-08-03
Supplement: 41467_2023_40310_MOESM1_ESM.pdf [file 41467_2023_40310_MOESM1_ESM.pdf]

## Supplementary Results

**sTable 1: Characteristics of participants with COVID-19 overall and in subgroups by the genetic risk of coronary artery disease**

| Participant characteristics                           | All eligible participants <sup>1</sup> | Participants with COVID-19 |                  |                           |                   | SMD   |
|-------------------------------------------------------|----------------------------------------|----------------------------|------------------|---------------------------|-------------------|-------|
|                                                       |                                        | All                        | Low genetic risk | Intermediate genetic risk | High genetic risk |       |
| Number                                                | 407453                                 | 106005                     | 21201            | 63603                     | 21201             |       |
| Mean age, year (SD)                                   | 69.46 (8.14)                           | 67.68 (8.26)               | 67.48 (8.27)     | 67.72 (8.25)              | 67.77 (8.25)      | 0.023 |
| sex, No. (%)                                          |                                        |                            |                  |                           |                   |       |
| Female                                                | 225700 (55.4)                          | 58045 (54.8)               | 11559 (54.5)     | 34930 (54.9)              | 11556 (54.5)      | 0.006 |
| Male                                                  | 181752 (44.6)                          | 47960 (45.2)               | 9642 (45.5)      | 28673 (45.1)              | 9645 (45.5)       |       |
| Ethnicity, No. (%)                                    |                                        |                            |                  |                           |                   |       |
| White                                                 | 375824 (92.2)                          | 94821 (89.4)               | 18755 (88.5)     | 57059 (89.7)              | 19007 (89.7)      | 0.027 |
| Other ethnic groups                                   | 31629 ( 7.8)                           | 11184 (10.6)               | 2446 (11.5)      | 6544 (10.3)               | 2194 (10.3)       |       |
| Obesity, No. (%)                                      |                                        |                            |                  |                           |                   |       |
| BMI < 30                                              | 310852 (76.3)                          | 80339 (75.8)               | 15700 (74.1)     | 48282 (75.9)              | 16357 (77.2)      | 0.048 |
| BMI ≥ 30                                              | 96601 (23.7)                           | 25666 (24.2)               | 5501 (25.9)      | 15321 (24.1)              | 4844 (22.8)       |       |
| Socioeconomic deprivation <sup>2</sup> , mean (SD)    | 17.47 (13.75)                          | 17.13 (13.19)              | 17.65 (13.52)    | 17.04 (13.07)             | 16.86 (13.21)     | 0.04  |
| Education categories <sup>3</sup> , No. (%)           |                                        |                            |                  |                           |                   |       |
| I                                                     | 72698 (17.8)                           | 13808 (13.0)               | 3099 (14.6)      | 8235 (12.9)               | 2474 (11.7)       | 0.082 |
| II                                                    | 111099 (27.3)                          | 30324 (28.6)               | 6270 (29.6)      | 18301 (28.8)              | 5753 (27.1)       |       |
| III                                                   | 45501 (11.2)                           | 12762 (12.0)               | 2514 (11.9)      | 7592 (11.9)               | 2656 (12.5)       |       |
| IV                                                    | 20685 ( 5.1)                           | 5113 ( 4.8)                | 1027 ( 4.8)      | 3080 ( 4.8)               | 1006 ( 4.7)       |       |
| V                                                     | 157469 (38.6)                          | 43998 (41.5)               | 8291 (39.1)      | 26395 (41.5)              | 9312 (43.9)       |       |
| <b>Individual lifestyle factors, No. (%)</b>          |                                        |                            |                  |                           |                   |       |
| Smoking status                                        |                                        |                            |                  |                           |                   |       |
| Never or past                                         | 367963 (90.3)                          | 96827 (91.3)               | 19294 (91.0)     | 58074 (91.3)              | 19459 (91.8)      | 0.019 |
| Current                                               | 39490 ( 9.7)                           | 9178 ( 8.7)                | 1907 ( 9.0)      | 5529 ( 8.7)               | 1742 ( 8.2)       |       |
| Alcohol intake                                        |                                        |                            |                  |                           |                   |       |
| ≤ 4 times week                                        | 324878 (79.7)                          | 85137 (80.3)               | 17212 (81.2)     | 51072 (80.3)              | 16853 (79.5)      | 0.028 |
| Daily or almost daily                                 | 82575 (20.3)                           | 20868 (19.7)               | 3989 (18.8)      | 12531 (19.7)              | 4348 (20.5)       |       |
| Physical activity                                     |                                        |                            |                  |                           |                   |       |
| ≥150 min per week of MIPA or ≥75 min per week of VIPA | 344442 (84.5)                          | 88608 (83.6)               | 17657 (83.3)     | 53218 (83.7)              | 17733 (83.6)      | 0.007 |

|                                                      |               |              |              |              |              |       |
|------------------------------------------------------|---------------|--------------|--------------|--------------|--------------|-------|
| <150 min per week of MIPA & <75 min per week of VIPA | 63011 (15.5)  | 17397 (16.4) | 3544 (16.7)  | 10385 (16.3) | 3468 (16.4)  |       |
| Television viewing time                              |               |              |              |              |              |       |
| < 4 h/day                                            | 293745 (72.1) | 79656 (75.1) | 15548 (73.3) | 47827 (75.2) | 16281 (76.8) | 0.053 |
| ≥ 4 h/day                                            | 113708 (27.9) | 26349 (24.9) | 5653 (26.7)  | 15776 (24.8) | 4920 (23.2)  |       |
| Sleep duration                                       |               |              |              |              |              |       |
| ≥7 & ≤9h/day                                         | 301120 (73.9) | 79162 (74.7) | 15616 (73.7) | 47554 (74.8) | 15992 (75.4) | 0.027 |
| <7 or >9h/day                                        | 106333 (26.1) | 26843 (25.3) | 5585 (26.3)  | 16049 (25.2) | 5209 (24.6)  |       |
| Fruit and vegetable intake                           |               |              |              |              |              |       |
| ≥ 400 g/day                                          | 326692 (80.2) | 84622 (79.8) | 16878 (79.6) | 50750 (79.8) | 16994 (80.2) | 0.009 |
| <400 g/ day                                          | 80761 (19.8)  | 21383 (20.2) | 4323 (20.4)  | 12853 (20.2) | 4207 (19.8)  |       |
| Oily fish intake                                     |               |              |              |              |              |       |
| ≥1 portion/week                                      | 229373 (56.3) | 56737 (53.5) | 11354 (53.6) | 33965 (53.4) | 11418 (53.9) | 0.006 |
| <1 portion/week                                      | 178080 (43.7) | 49268 (46.5) | 9847 (46.4)  | 29638 (46.6) | 9783 (46.1)  |       |
| Red meat intake                                      |               |              |              |              |              |       |
| ≤3 portion/week                                      | 187802 (46.1) | 49840 (47.0) | 10307 (48.6) | 29856 (46.9) | 9677 (45.6)  | 0.04  |
| >3 portion/week                                      | 219651 (53.9) | 56165 (53.0) | 10894 (51.4) | 33747 (53.1) | 11524 (54.4) |       |
| Processed meat intake                                |               |              |              |              |              |       |
| ≤1 portion/week                                      | 281938 (69.2) | 72015 (67.9) | 14542 (68.6) | 43087 (67.7) | 14386 (67.9) | 0.012 |
| >1 portion/week                                      | 125515 (30.8) | 33990 (32.1) | 6659 (31.4)  | 20516 (32.3) | 6815 (32.1)  |       |
| Composite healthy lifestyle, No. (%)                 |               |              |              |              |              |       |
| Unfavourable                                         | 30746 ( 7.5)  | 7816 ( 7.4)  | 1558 ( 7.3)  | 4760 ( 7.5)  | 1498 ( 7.1)  | 0.013 |
| Moderate                                             | 154864 (38.0) | 40238 (38.0) | 8101 (38.2)  | 24101 (37.9) | 8036 (37.9)  |       |
| Favourable                                           | 221843 (54.4) | 57951 (54.7) | 11542 (54.4) | 34742 (54.6) | 11667 (55.0) |       |

BMI: Body mass index. MIPA: Moderate intensity physical activity. VIPA: vigorous intensity physical activity. SMD: standardized mean difference

<sup>1</sup> All eligible participants in UK Biobank included those who survived when this study began (March 1, 2020).<sup>2</sup> High score indicates higher levels of deprivation. <sup>3</sup> Education category I includes self-reported “None of the above” and “Prefer not to answer”, II includes “CSEs or equivalent” and “O levels/GCSEs or equivalent”, III includes “A levels/AS levels or equivalent”, IV includes “Other professional qualifications e.g.: nursing, teaching”, and V includes “NVQ or HND or HNC or equivalent” and “College or University degree.”

**sTable 2: Characteristics of participants with COVID-19 overall and in subgroups by the genetic risk of venous thromboembolism**

| Participant characteristics                           | All eligible participants <sup>2</sup> | Participants with COVID-19 |                  |                           |                   | SMD   |
|-------------------------------------------------------|----------------------------------------|----------------------------|------------------|---------------------------|-------------------|-------|
|                                                       |                                        | All                        | Low genetic risk | Intermediate genetic risk | High genetic risk |       |
| Number                                                | 407453                                 | 106005                     | 21201            | 63603                     | 21201             |       |
| Mean age, year (SD)                                   | 69.46 (8.14)                           | 67.68 (8.26)               | 67.59 (8.28)     | 67.73 (8.23)              | 67.63 (8.30)      | 0.012 |
| sex, No. (%)                                          |                                        |                            |                  |                           |                   |       |
| Female                                                | 225700 (55.4)                          | 58045 (54.8)               | 11573 (54.6)     | 34805 (54.7)              | 11667 (55.0)      | 0.006 |
| Male                                                  | 181752 (44.6)                          | 47960 (45.2)               | 9628 (45.4)      | 28798 (45.3)              | 9534 (45.0)       |       |
| Ethnicity, No. (%)                                    |                                        |                            |                  |                           |                   |       |
| White                                                 | 375824 (92.2)                          | 94821 (89.4)               | 18868 (89.0)     | 57009 (89.6)              | 18944 (89.4)      | 0.014 |
| Other ethnic groups                                   | 31629 ( 7.8)                           | 11184 (10.6)               | 2333 (11.0)      | 6594 (10.4)               | 2257 (10.6)       |       |
| Obesity, No. (%)                                      |                                        |                            |                  |                           |                   |       |
| BMI < 30                                              | 310852 (76.3)                          | 80339 (75.8)               | 15918 (75.1)     | 48075 (75.6)              | 16346 (77.1)      | 0.032 |
| BMI ≥ 30                                              | 96601 (23.7)                           | 25666 (24.2)               | 5283 (24.9)      | 15528 (24.4)              | 4855 (22.9)       |       |
| Socioeconomic deprivation, mean (SD)                  | 17.47 (13.75)                          | 17.13 (13.19)              | 17.11 (13.19)    | 17.15 (13.22)             | 17.08 (13.11)     | 0.004 |
| Education categories <sup>3</sup> , No. (%)           |                                        |                            |                  |                           |                   |       |
| I                                                     | 72698 (17.8)                           | 13808 (13.0)               | 2764 (13.0)      | 8372 (13.2)               | 2672 (12.6)       | 0.023 |
| II                                                    | 111099 (27.3)                          | 30324 (28.6)               | 6077 (28.7)      | 18316 (28.8)              | 5931 (28.0)       |       |
| III                                                   | 45501 (11.2)                           | 12762 (12.0)               | 2612 (12.3)      | 7551 (11.9)               | 2599 (12.3)       |       |
| IV                                                    | 20685 ( 5.1)                           | 5113 ( 4.8)                | 1018 ( 4.8)      | 3085 ( 4.9)               | 1010 ( 4.8)       |       |
| V                                                     | 157469 (38.6)                          | 43998 (41.5)               | 8730 (41.2)      | 26279 (41.3)              | 8989 (42.4)       |       |
| <b>Individual lifestyle factors, No. (%)</b>          |                                        |                            |                  |                           |                   |       |
| Smoking status                                        |                                        |                            |                  |                           |                   |       |
| Never or past                                         | 367963 (90.3)                          | 96827 (91.3)               | 19381 (91.4)     | 58027 (91.2)              | 19419 (91.6)      | 0.009 |
| Current                                               | 39490 ( 9.7)                           | 9178 ( 8.7)                | 1820 ( 8.6)      | 5576 ( 8.8)               | 1782 ( 8.4)       |       |
| Alcohol intake                                        |                                        |                            |                  |                           |                   |       |
| ≤ 4 times week                                        | 324878 (79.7)                          | 85137 (80.3)               | 17080 (80.6)     | 51035 (80.2)              | 17022 (80.3)      | 0.005 |
| Daily or almost daily                                 | 82575 (20.3)                           | 20868 (19.7)               | 4121 (19.4)      | 12568 (19.8)              | 4179 (19.7)       |       |
| Physical activity                                     |                                        |                            |                  |                           |                   |       |
| ≥150 min per week of MIPA or ≥75 min per week of VIPA | 344442 (84.5)                          | 88608 (83.6)               | 17662 (83.3)     | 53155 (83.6)              | 17791 (83.9)      | 0.011 |
| <150 min per week of MIPA & <75 min per week of VIPA  | 63011 (15.5)                           | 17397 (16.4)               | 3539 (16.7)      | 10448 (16.4)              | 3410 (16.1)       |       |
| Television viewing time                               |                                        |                            |                  |                           |                   |       |

|                                      |               |              |              |              |              |       |
|--------------------------------------|---------------|--------------|--------------|--------------|--------------|-------|
| < 4 h/day                            | 293745 (72.1) | 79656 (75.1) | 15911 (75.0) | 47693 (75.0) | 16052 (75.7) | 0.011 |
| ≥ 4 h/day                            | 113708 (27.9) | 26349 (24.9) | 5290 (25.0)  | 15910 (25.0) | 5149 (24.3)  |       |
| Sleep duration                       |               |              |              |              |              |       |
| ≥7 & ≤9h/day                         | 301120 (73.9) | 79162 (74.7) | 15744 (74.3) | 47551 (74.8) | 15867 (74.8) | 0.009 |
| <7 or >9h/day                        | 106333 (26.1) | 26843 (25.3) | 5457 (25.7)  | 16052 (25.2) | 5334 (25.2)  |       |
| Fruit and vegetable intake           |               |              |              |              |              |       |
| ≥ 400 g/day                          | 326692 (80.2) | 84622 (79.8) | 17030 (80.3) | 50654 (79.6) | 16938 (79.9) | 0.011 |
| <400 g/ day                          | 80761 (19.8)  | 21383 (20.2) | 4171 (19.7)  | 12949 (20.4) | 4263 (20.1)  |       |
| Oily fish intake                     |               |              |              |              |              |       |
| ≥1 portion/week                      | 229373 (56.3) | 56737 (53.5) | 11380 (53.7) | 34009 (53.5) | 11348 (53.5) | 0.003 |
| <1 portion/week                      | 178080 (43.7) | 49268 (46.5) | 9821 (46.3)  | 29594 (46.5) | 9853 (46.5)  |       |
| Red meat intake                      |               |              |              |              |              |       |
| ≤3 portion/week                      | 187802 (46.1) | 49840 (47.0) | 9912 (46.8)  | 29989 (47.2) | 9939 (46.9)  | 0.005 |
| >3 portion/week                      | 219651 (53.9) | 56165 (53.0) | 11289 (53.2) | 33614 (52.8) | 11262 (53.1) |       |
| Processed meat intake                |               |              |              |              |              |       |
| ≤1 portion/week                      | 281938 (69.2) | 72015 (67.9) | 14427 (68.0) | 43137 (67.8) | 14451 (68.2) | 0.005 |
| >1 portion/week                      | 125515 (30.8) | 33990 (32.1) | 6774 (32.0)  | 20466 (32.2) | 6750 (31.8)  |       |
| Composite healthy lifestyle, No. (%) |               |              |              |              |              |       |
| Unfavourable                         | 30746 ( 7.5)  | 7816 ( 7.4)  | 1569 ( 7.4)  | 4770 ( 7.5)  | 1477 ( 7.0)  | 0.014 |
| Moderate                             | 154864 (38.0) | 40238 (38.0) | 8069 (38.1)  | 24120 (37.9) | 8049 (38.0)  |       |
| Favourable                           | 221843 (54.4) | 57951 (54.7) | 11563 (54.5) | 34713 (54.6) | 11675 (55.1) |       |

BMI: Body mass index. MIPA: Moderate intensity physical activity. VIPA: vigorous intensity physical activity. SMD: standardized mean difference

<sup>1</sup> All eligible participants in UK Biobank included those who survived when this study began (March 1, 2020).<sup>2</sup> High score indicates higher levels of deprivation. <sup>3</sup> Education category I includes self-reported “None of the above” and “Prefer not to answer”, II includes “CSEs or equivalent” and “O levels/GCSEs or equivalent”, III includes “A levels/AS levels or equivalent”, IV includes “Other professional qualifications e.g.: nursing, teaching”, and V includes “NVQ or HND or HNC or equivalent” and “College or University degree.”

**sTable 3: Characteristics of participants with COVID-19 overall and in subgroups by the genetic risk of ischaemic stroke**

| Participant characteristics                           | All eligible participants <sup>2</sup> | Participants with COVID-19 |                  |                           |                   | SMD   |
|-------------------------------------------------------|----------------------------------------|----------------------------|------------------|---------------------------|-------------------|-------|
|                                                       |                                        | All                        | Low genetic risk | Intermediate genetic risk | High genetic risk |       |
| Number                                                | 407453                                 | 106005                     | 21201            | 63603                     | 21201             |       |
| Mean age, year (SD)                                   | 69.46 (8.14)                           | 67.68 (8.26)               | 67.55 (8.24)     | 67.69 (8.27)              | 67.79 (8.22)      | 0.02  |
| sex, No. (%)                                          |                                        |                            |                  |                           |                   |       |
| Female                                                | 225700 (55.4)                          | 58045 (54.8)               | 11545 (54.5)     | 34878 (54.8)              | 11622 (54.8)      | 0.005 |
| Male                                                  | 181752 (44.6)                          | 47960 (45.2)               | 9656 (45.5)      | 28725 (45.2)              | 9579 (45.2)       |       |
| Ethnicity, No. (%)                                    |                                        |                            |                  |                           |                   |       |
| White                                                 | 375824 (92.2)                          | 94821 (89.4)               | 18976 (89.5)     | 57108 (89.8)              | 18737 (88.4)      | 0.03  |
| Other ethnic groups                                   | 31629 ( 7.8)                           | 11184 (10.6)               | 2225 (10.5)      | 6495 (10.2)               | 2464 (11.6)       |       |
| Obesity, No. (%)                                      |                                        |                            |                  |                           |                   |       |
| BMI < 30                                              | 310852 (76.3)                          | 80339 (75.8)               | 15125 (71.3)     | 48316 (76.0)              | 16898 (79.7)      | 0.13  |
| BMI ≥ 30                                              | 96601 (23.7)                           | 25666 (24.2)               | 6076 (28.7)      | 15287 (24.0)              | 4303 (20.3)       |       |
| Socioeconomic deprivation, mean (SD)                  | 17.47 (13.75)                          | 17.13 (13.19)              | 17.77 (13.64)    | 17.06 (13.12)             | 16.68 (12.94)     | 0.055 |
| Education categories <sup>3</sup> , No. (%)           |                                        |                            |                  |                           |                   |       |
| I                                                     | 72698 (17.8)                           | 13808 (13.0)               | 3188 (15.0)      | 8276 (13.0)               | 2344 (11.1)       | 0.108 |
| II                                                    | 111099 (27.3)                          | 30324 (28.6)               | 6303 (29.7)      | 18303 (28.8)              | 5718 (27.0)       |       |
| III                                                   | 45501 (11.2)                           | 12762 (12.0)               | 2534 (12.0)      | 7602 (12.0)               | 2626 (12.4)       |       |
| IV                                                    | 20685 ( 5.1)                           | 5113 ( 4.8)                | 1067 ( 5.0)      | 3061 ( 4.8)               | 985 ( 4.6)        |       |
| V                                                     | 157469 (38.6)                          | 43998 (41.5)               | 8109 (38.2)      | 26361 (41.4)              | 9528 (44.9)       |       |
| <b>Individual lifestyle factors, No. (%)</b>          |                                        |                            |                  |                           |                   |       |
| Smoking status                                        |                                        |                            |                  |                           |                   |       |
| Never or past                                         | 367963 (90.3)                          | 96827 (91.3)               | 19193 (90.5)     | 58109 (91.4)              | 19525 (92.1)      | 0.037 |
| Current                                               | 39490 ( 9.7)                           | 9178 ( 8.7)                | 2008 ( 9.5)      | 5494 ( 8.6)               | 1676 ( 7.9)       |       |
| Alcohol intake                                        |                                        |                            |                  |                           |                   |       |
| ≤ 4 times week                                        | 324878 (79.7)                          | 85137 (80.3)               | 17223 (81.2)     | 50980 (80.2)              | 16934 (79.9)      | 0.023 |
| Daily or almost daily                                 | 82575 (20.3)                           | 20868 (19.7)               | 3978 (18.8)      | 12623 (19.8)              | 4267 (20.1)       |       |
| Physical activity                                     |                                        |                            |                  |                           |                   |       |
| ≥150 min per week of MIPA or ≥75 min per week of VIPA | 344442 (84.5)                          | 88608 (83.6)               | 17546 (82.8)     | 53226 (83.7)              | 17836 (84.1)      | 0.025 |
| <150 min per week of MIPA & <75 min per week of VIPA  | 63011 (15.5)                           | 17397 (16.4)               | 3655 (17.2)      | 10377 (16.3)              | 3365 (15.9)       |       |
| Television viewing time                               |                                        |                            |                  |                           |                   |       |

|                                      |               |              |              |              |              |       |
|--------------------------------------|---------------|--------------|--------------|--------------|--------------|-------|
| < 4 h/day                            | 293745 (72.1) | 79656 (75.1) | 15413 (72.7) | 47719 (75.0) | 16524 (77.9) | 0.081 |
| ≥ 4 h/day                            | 113708 (27.9) | 26349 (24.9) | 5788 (27.3)  | 15884 (25.0) | 4677 (22.1)  |       |
| Sleep duration                       |               |              |              |              |              |       |
| ≥7 & ≤9h/day                         | 301120 (73.9) | 79162 (74.7) | 15487 (73.0) | 47614 (74.9) | 16061 (75.8) | 0.041 |
| <7 or >9h/day                        | 106333 (26.1) | 26843 (25.3) | 5714 (27.0)  | 15989 (25.1) | 5140 (24.2)  |       |
| Fruit and vegetable intake           |               |              |              |              |              |       |
| ≥ 400 g/day                          | 326692 (80.2) | 84622 (79.8) | 16710 (78.8) | 50852 (80.0) | 17060 (80.5) | 0.027 |
| <400 g/ day                          | 80761 (19.8)  | 21383 (20.2) | 4491 (21.2)  | 12751 (20.0) | 4141 (19.5)  |       |
| Oily fish intake                     |               |              |              |              |              |       |
| ≥1 portion/week                      | 229373 (56.3) | 56737 (53.5) | 11154 (52.6) | 33994 (53.4) | 11589 (54.7) | 0.027 |
| <1 portion/week                      | 178080 (43.7) | 49268 (46.5) | 10047 (47.4) | 29609 (46.6) | 9612 (45.3)  |       |
| Red meat intake                      |               |              |              |              |              |       |
| ≤3 portion/week                      | 187802 (46.1) | 49840 (47.0) | 10405 (49.1) | 29919 (47.0) | 9516 (44.9)  | 0.056 |
| >3 portion/week                      | 219651 (53.9) | 56165 (53.0) | 10796 (50.9) | 33684 (53.0) | 11685 (55.1) |       |
| Processed meat intake                |               |              |              |              |              |       |
| ≤1 portion/week                      | 281938 (69.2) | 72015 (67.9) | 14308 (67.5) | 43226 (68.0) | 14481 (68.3) | 0.012 |
| >1 portion/week                      | 125515 (30.8) | 33990 (32.1) | 6893 (32.5)  | 20377 (32.0) | 6720 (31.7)  |       |
| Composite healthy lifestyle, No. (%) |               |              |              |              |              |       |
| Unfavourable                         | 30746 ( 7.5)  | 7816 ( 7.4)  | 1700 ( 8.0)  | 4629 ( 7.3)  | 1487 ( 7.0)  | 0.041 |
| Moderate                             | 154864 (38.0) | 40238 (38.0) | 8224 (38.8)  | 24168 (38.0) | 7846 (37.0)  |       |
| Favourable                           | 221843 (54.4) | 57951 (54.7) | 11277 (53.2) | 34806 (54.7) | 11868 (56.0) |       |

BMI: Body mass index. MIPA: Moderate intensity physical activity. VIPA: vigorous intensity physical activity. SMD: standardized mean difference

<sup>1</sup> All eligible participants in UK Biobank included those who survived when this study began (March 1, 2020).<sup>2</sup> High score indicates higher levels of deprivation. <sup>3</sup> Education category I includes self-reported “None of the above” and “Prefer not to answer”, II includes “CSEs or equivalent” and “O levels/GCSEs or equivalent”, III includes “A levels/AS levels or equivalent”, IV includes “Other professional qualifications e.g.: nursing, teaching”, and V includes “NVQ or HND or HNC or equivalent” and “College or University degree.”

**sTable 4: Summary statistics of cardiovascular and thromboembolic events following COVID-19**

| Outcomes                | Total follow-up (days) | Number of events | Incidence rate per 1,000 person-years | Cumulative incidence (%) |
|-------------------------|------------------------|------------------|---------------------------------------|--------------------------|
| Atrial fibrillation     | 9097074                | 1397             | 56.05                                 | 1.31                     |
| Coronary artery disease | 9129955                | 733              | 29.30                                 | 0.69                     |
| Venous thromboembolism  | 9152751                | 244              | 9.73                                  | 0.23                     |
| Ischemic stroke         | 9161711                | 104              | 4.14                                  | 0.09                     |

**Figure 1: Distribution of the polygenic risk scores and test of potential non-linear relationships.**

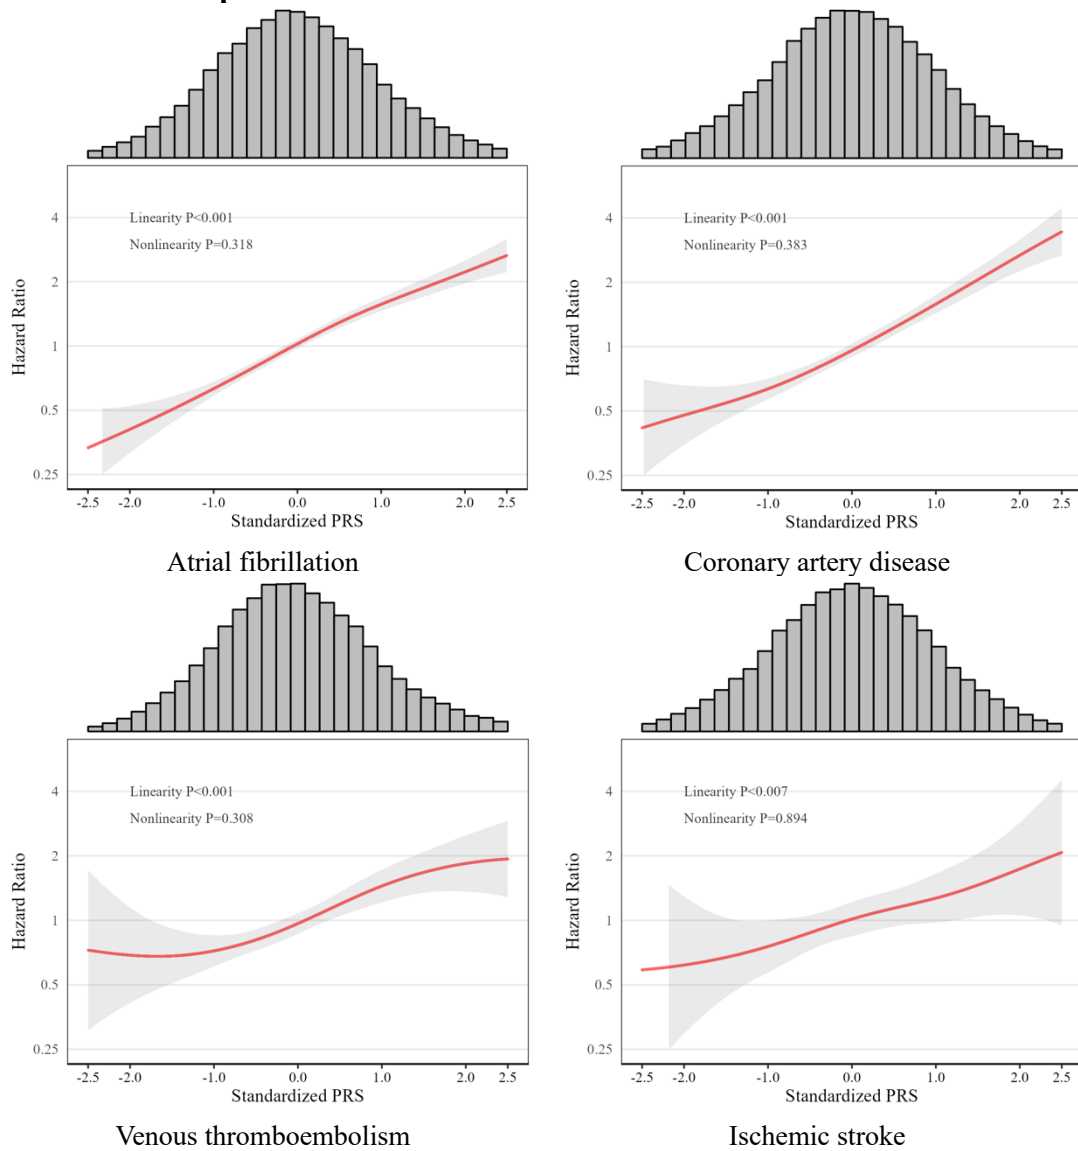

The confidence interval of hazard ratios was removed if it was larger than 4 or smaller than 0.25. The penalized splines for the Cox proportional hazards model were implemented using the “pspline” function in R, with the degrees of freedom (df) set at 3. Two p-values based on likelihood ratio test statistics with a chi-square distribution are reported: one evaluates the significance of the linear term and the other evaluates the significance of the non-linear terms. A significant p-value for the non-linear terms indicates that the relationship between the polygenic risk score and the hazard is not linear..



**sFigure 2: Adjusted hazard ratios of each healthy lifestyle factor**

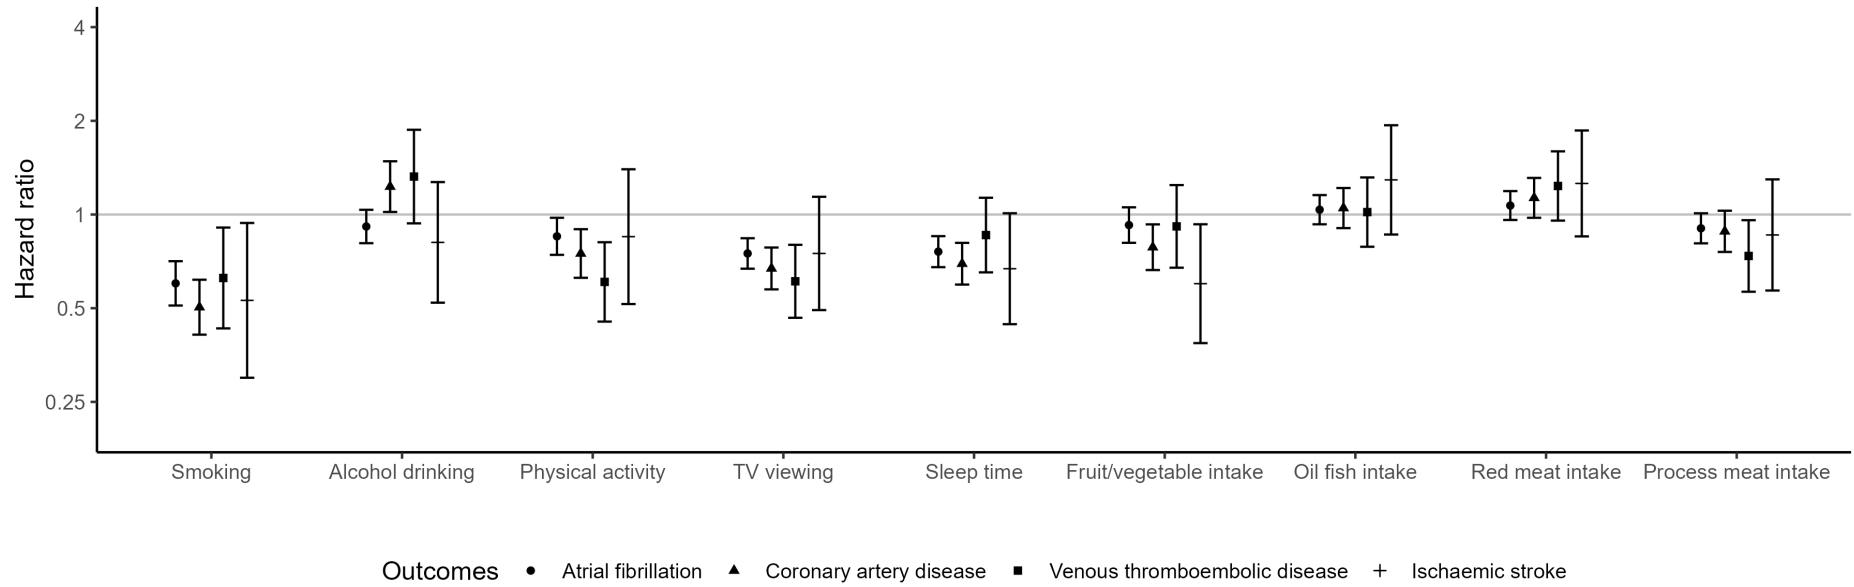

Point estimates are provided with 95% confidence intervals without correcting for multiple testing.

**sTable 5: Adjusted hazard ratios in sensitivity analyses**

|                                                                | <b>Atrial fibrillation</b> | <b>Coronary artery disease</b> | <b>Venous thromboembolism</b> | <b>Ischemic stroke</b> |
|----------------------------------------------------------------|----------------------------|--------------------------------|-------------------------------|------------------------|
| <b>Sensitivity analysis for the genetic exposure</b>           |                            |                                |                               |                        |
| Main results                                                   | 1.52 (1.44 to 1.60)        | 1.57 (1.46 to 1.69)            | 1.33 (1.18 to 1.50)           | 1.27 (1.05 to 1.55)    |
| Use of enhanced PRS                                            | 1.58 (1.40 to 1.77)        | 1.68 (1.45 to 1.95)            | 1.38 (1.09 to 1.76)           | 1.40 (0.91 to 2.15)    |
| Incident CVE events <sup>1</sup>                               | 1.47 (1.37 to 1.59)        | 1.69 (1.53 to 1.88)            | 1.35 (1.19 to 1.53)           | 1.25 (1.01 to 1.54)    |
| Primary hospital admission diagnoses <sup>2</sup>              | 1.50 (1.37 to 1.64)        | 1.57 (1.39 to 1.78)            | 1.27 (1.08 to 1.48)           | 0.94 (0.65 to 1.35)    |
| Diabetes (Negative control outcome) <sup>3</sup>               | 0.91 (0.81 to 1.02)        | 1.06 (0.94 to 1.18)            | 1.11 (0.98 to 1.24)           | 1.07 (0.96 to 1.20)    |
| <b>Sensitivity analysis for the lifestyle exposure</b>         |                            |                                |                               |                        |
| Main results                                                   | 0.88 (0.85 to 0.92)        | 0.85 (0.81 to 0.90)            | 0.87 (0.79 to 0.95)           | 0.84 (0.73 to 0.97)    |
| Incident cardiovascular and thromboembolic events <sup>1</sup> | 0.90 (0.85 to 0.95)        | 0.87 (0.81 to 0.94)            | 0.87 (0.79 to 0.96)           | 0.90 (0.77 to 1.05)    |
| Primary hospital admission diagnoses <sup>2</sup>              | 0.87 (0.81 to 0.93)        | 0.84 (0.77 to 0.92)            | 0.90 (0.80 to 1.01)           | 0.76 (0.59 to 0.98)    |

<sup>1</sup>Number of incident events were 677, 365, 225 and 90, respectively, for atrial fibrillation, coronary artery disease, venous thromboembolism and Ischaemic stroke. <sup>2</sup>Number of events related hospital admission were 442, 248, 141 and 29, accordingly. <sup>3</sup>Number of diabetes event was 289 during the same 90 days' follow-up as the primary outcomes.

## Supplementary Methods

### UK Biobank self-reported highest qualification mapped to the International Standard Classification of Education (ISCED).

| UK Biobank self-reported highest qualification          | Years of education | ISCED |
|---------------------------------------------------------|--------------------|-------|
| Prefer not to answer                                    | 7                  | 1     |
| None of the above                                       | 7                  | 1     |
| CSEs or equivalent                                      | 10                 | 2     |
| O levels/GCSEs or equivalent                            | 10                 | 2     |
| A levels/AS levels or equivalent                        | 13                 | 3     |
| Other professional qualifications eg: nursing, teaching | 15                 | 4     |
| NVQ or HND or HNC or equivalent                         | 19                 | 5     |
| College or University degree                            | 20                 | 5     |

## Variables used to create the lifestyle score.

| Lifestyle factor                     | Questionnaire                                                                                                                                                                                                     | Healthy (0)                                         | Unhealthy (1)             |
|--------------------------------------|-------------------------------------------------------------------------------------------------------------------------------------------------------------------------------------------------------------------|-----------------------------------------------------|---------------------------|
| <b>1. Smoking status</b>             | "Do you smoke tobacco now?" and "In the past, how often have you smoked tobacco?"                                                                                                                                 | past or never smoker                                | current                   |
| <b>2. Alcohol intake</b>             | "About how often do you drink alcohol?"                                                                                                                                                                           | ≤ 4 times week                                      | Daily or almost daily     |
| <b>3. Physical activity</b>          | IPAQ short form2– total time walking or moderate and vigorous-intensity PA in previous week *                                                                                                                     | ≥150 min/week moderate or ≥ 75 min/week vigorous PA | < 75 min/week vigorous PA |
| <b>4. TV viewing /sedentary time</b> | "In a typical day, how many hours do you spend watching TV?" ‡                                                                                                                                                    | < 4 h/day                                           | ≥ 4 h/day                 |
| <b>5. Sleep time</b>                 | "About how many hours sleep do you get in every 24 hours?"                                                                                                                                                        | >7 or <9h/day                                       | <7 or >9h/day             |
| <b>Dietary characteristics</b>       | Individual dietary components contributed directly to lifestyle score.ϕ                                                                                                                                           |                                                     |                           |
| <b>6. Fruit and vegetable intake</b> | "About how many of .... would you eat per day?" Separate questions for pieces of fresh and dried fruit, tablespoons of salad or cooked/raw vegetables. Combined and converted to g/day (1 portion = 80 g)         | ≥ 400 g/day                                         | <400 g/ day               |
| <b>7. Oily fish intake</b>           | "How often do you eat oily fish? (e.g. sardines, salmon, mackerel, herring)"                                                                                                                                      | ≥1 portion/week                                     | <1 portion/week           |
| <b>8. Red meat intake</b>            | "How often do you eat...?" Separate questions for Beef / lamb or mutton / pork (excluding processed meats such as ham or bacon). Red meat included due to clear link between red meat and mortality. <sup>3</sup> | ≤3 portion/week                                     | >3 portion/week           |
| <b>9. Processed meat intake</b>      | "How often do you eat processed meats (such as bacon, ham, sausages, meat pies, kebabs, burgers, chicken nuggets)?"                                                                                               | ≤1 portion/week                                     | >1 portion/week           |

Participants were classified as “not at risk/healthy” or “at risk/unhealthy” based on their responses to questions for each lifestyle factor. \*UK Biobank physical activity (PA) data were analyzed in accordance with the International Physical Activity Questionnaire (IPAQ) scoring protocol, with total physical activity computed as the sum of walking, moderate, and vigorous activity, measured as metabolic equivalents (MET-hours/week). ‡ UK Biobank participants were asked about work-related sitting time and were not asked about discretionary/leisure time sedentary behavior. Therefore, TV viewing time, which is strongly associated with mortality, was used instead of sedentary time. UK Biobank participants were asked separately about time spent using a computer, excluding computer time at work. This information was used to check for implausible values for TV viewing time. ϕ National dietary guidelines were used as the basis for the dietary components.

*(Developed by Hamish M, Lancet Public Health 2018)*

**ICD-10 codes for defining cardiovascular and thromboembolic events and diabetes.**

| <b>Clinical events</b>                  | <b>ICD-10 codes</b>                |
|-----------------------------------------|------------------------------------|
| Atrial fibrillation                     | I48                                |
| Coronary artery disease                 | I21, I22, I23, I24.1, I25.2        |
| Ischaemic stroke                        | I63, I64                           |
| Venous thromboembolic disease           | I81, I82, I26, O22.3, O87.1, O08.2 |
| Diabetes (the negative control outcome) | E119                               |
